# Supplementary material for: A multiresidue analytical method for the detection of seven triazolopyrimidine sulfonamide herbicides in cereals, soybean and soil using the modified QuEChERS method and UHPLC-MS/MS
Source: Royal Society of Chemistry journal article supplement (doi:10.1039/c5ay01622c), 2015-01-01
Supplement: c5ay01622c1.pdf [file c5ay01622c1.pdf]

1. Flumetsulam: 326→129, 326→192

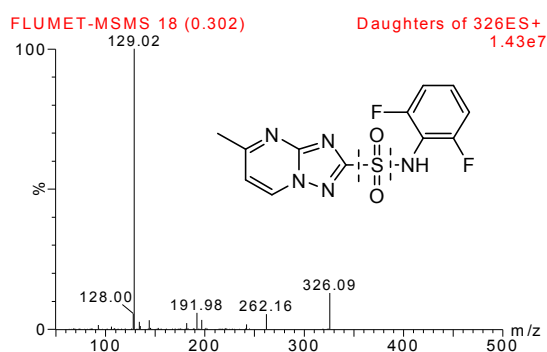

2. Florasulam: 360→129, 360→192

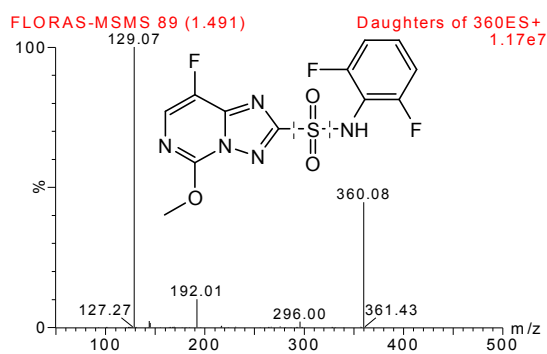

3. cloransulam-methyl: 430→398, 430→185

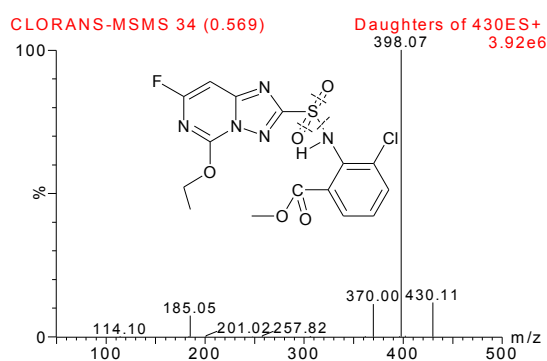

Fig.1. the structures showing the fragmentation for the representative analytes in MS/MS mode
